# Supplementary material for: Novel carbon-incorporated porous ZnFe2O4nanospheres for enhanced photocatalytic hydrogen generation under visible light irradiation
Source: Royal Society of Chemistry journal article supplement (doi:10.1039/c6ra05098k), 2016-01-01
Supplement: c6ra05098k1.pdf [file c6ra05098k1.pdf]

## Electronic Supplementary Information

---

### **Novel carbon-incorporated porous $\text{ZnFe}_2\text{O}_4$ nanospheres for enhanced photocatalytic hydrogen generation under visible light irradiation**

Hekai Zhu,<sup>a</sup> Minghao Fang,<sup>a\*</sup> Zhaohui Huang,<sup>a\*</sup> Yan'gai Liu,<sup>a</sup> Kai Chen,<sup>b</sup> Chao Tang,<sup>a</sup> Meng Wang,<sup>a</sup> Lina Zhang<sup>a</sup> and Xiaowen Wu<sup>a</sup>

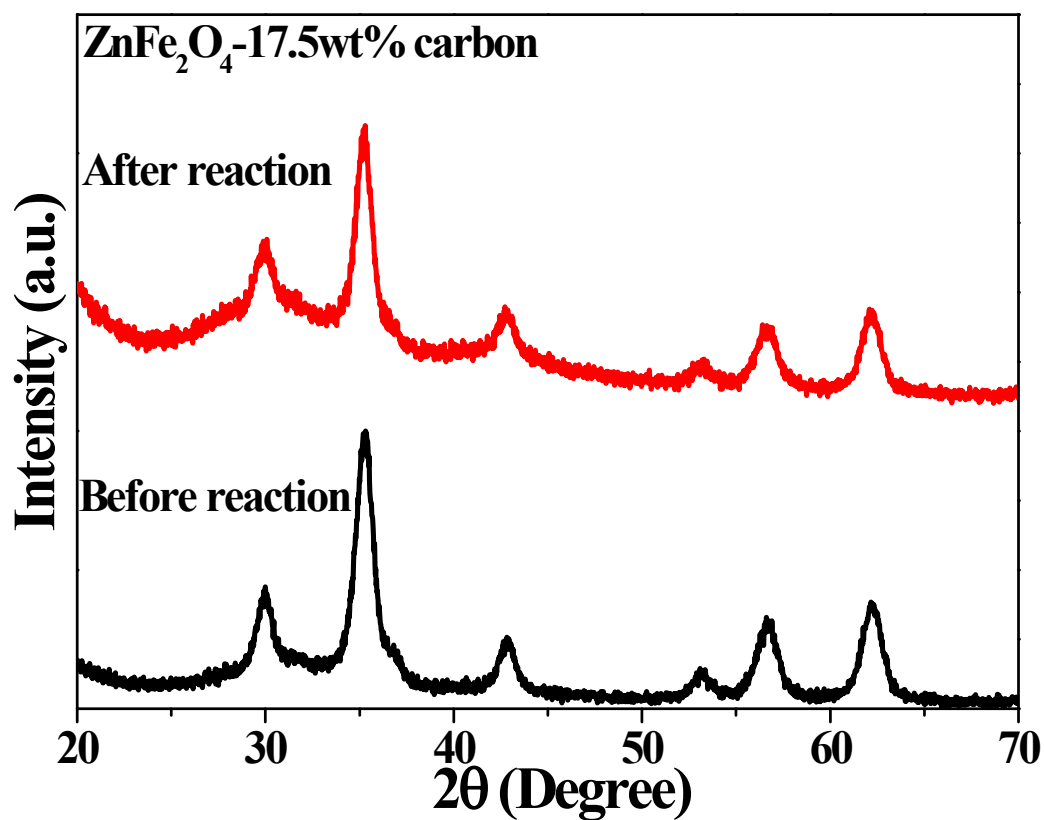

Fig. S1. XRD patterns of  $\text{ZnFe}_2\text{O}_4$ -17.5wt% carbon sample before and after the recycling experiments.

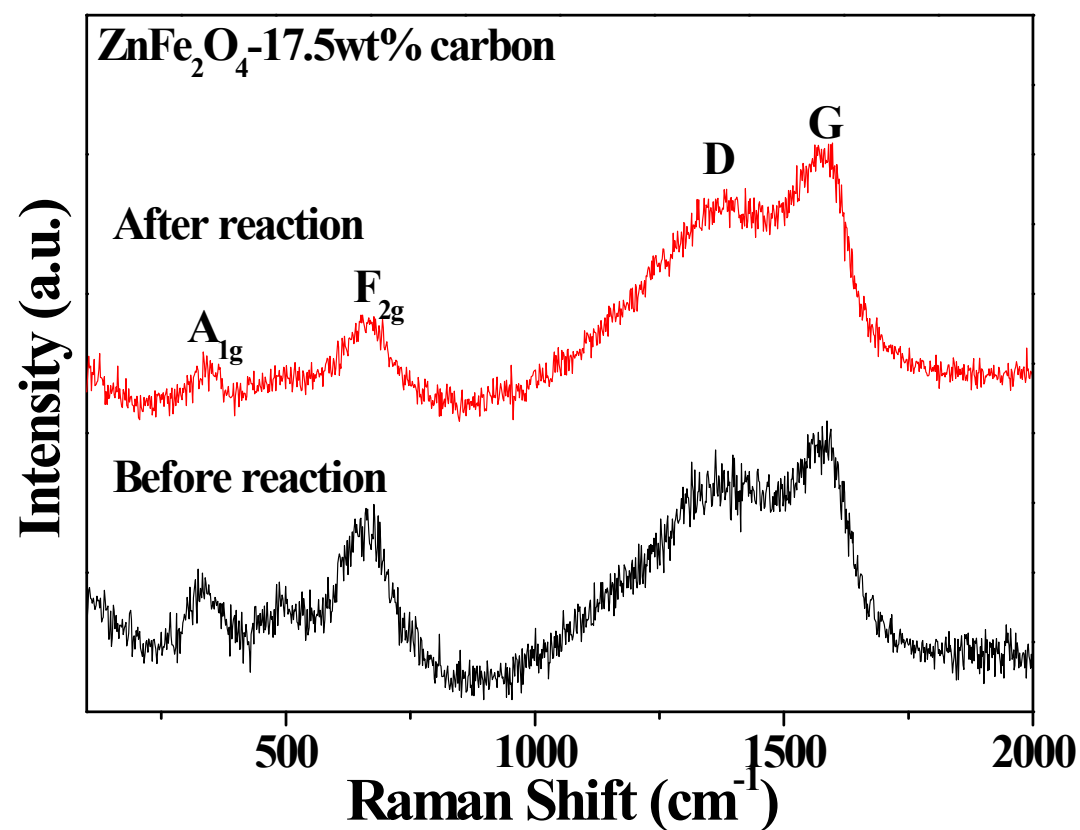

Fig. S2. Raman spectra of  $\text{ZnFe}_2\text{O}_4$ -17.5wt% carbon sample before and after the recycling experiments

Table S1. Comparison of photocatalytic activity in hydrogen evolution over ZnFe<sub>2</sub>O<sub>4</sub> system photocatalysts.

| Photocatalyst                                                           | Incident light                      | Reactant solution             | Cocatalyst | H <sub>2</sub> generation rate (μmol h <sup>-1</sup> g <sup>-1</sup> ) | Ref       |
|-------------------------------------------------------------------------|-------------------------------------|-------------------------------|------------|------------------------------------------------------------------------|-----------|
| ZnFe <sub>2</sub> O <sub>4</sub> nanosphere                             | λ >420nm<br>300 W<br>Xe-lamp        | 10 vol%<br>CH <sub>3</sub> OH | ---        | 155.89                                                                 | This work |
| ZnFe <sub>2</sub> O <sub>4</sub> -carbon Nanocomposites (sample ZF0-C3) | λ >420nm<br>300 W<br>Xe-lamp        | 10 vol%<br>CH <sub>3</sub> OH | ---        | 1160.40                                                                | This work |
| ZnFe <sub>2</sub> O <sub>4</sub> porous Nanorod                         | λ >420nm<br>250 W<br>Xe-lamp        | 20 vol%<br>CH <sub>3</sub> OH | ---        | 47.40                                                                  | 10        |
| ZnFe <sub>2</sub> O <sub>4</sub> spherical Particles                    | λ >420nm<br>250 W<br>UV-vis<br>lamp | Sodium sulfite<br>(0.05 M)    | ---        | 20                                                                     | 38        |
